# Supplementary material for: Identification of Conserved and Novel MicroRNAs during Tail Regeneration in the Mexican Axolotl
Source: MDPI journal article supplement (doi:10.3390/ijms160922046), 2015-09-11
Supplement: s1 [file s1]

## Supplementary Information

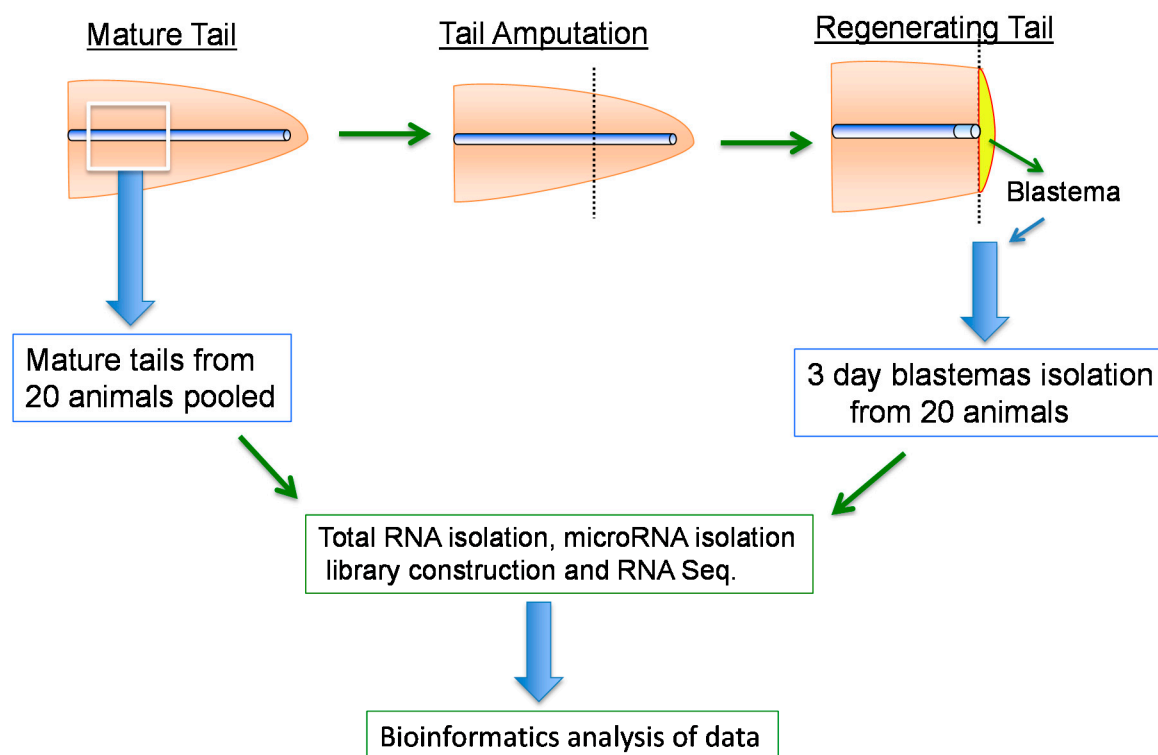

**Figure S1.** Schematic diagram outline where the tissue samples were collected from to construct the libraries used for deep sequencing of axolotl microRNAs. Tissue samples were collected from a tail region of 20 axolotls to construct the mature tissue library. Three day blastema samples were collected from 20 axolotls and RNA was extracted from the pooled tissue samples.

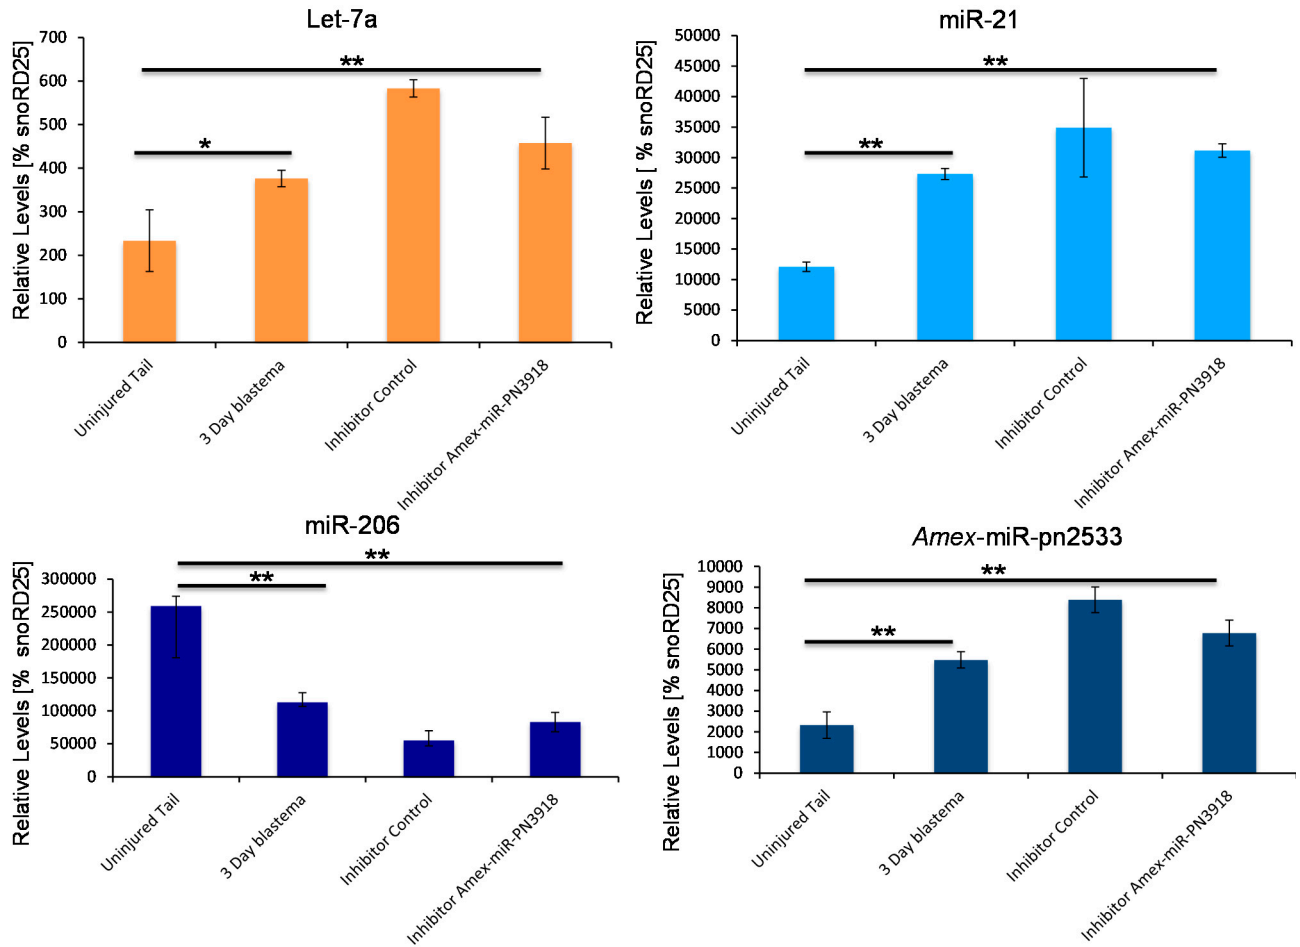

**Figure S2.** Quantitative RT-PCR analyses confirmed that the Amex-miR-pn3918 inhibitor did not affect the regulation of other microRNAs known to be differentially regulated in the 3 day tail blastema. Levels of let-7a, miR-21, miR-206 and Amex-pn2533 were quantified in uninjured tails, 3 day blastemas *versus* inhibitor control and Amex-miR-pn3918 inhibitor injected animals 3 days post injury. (\*  $p < 0.05$ , \*\*  $p < 0.01$ ).  $n = 3$ .
